# Supplementary material
Source: PubMed Central journal article supplement (PMC4515028)
Supplement: NIHMS708214-supplement-Hooks_Supplemental.pdf [file NIHMS708214-supplement-Hooks_Supplemental.pdf]

# Development of Homo- and Hetero-Multimers of Lung Cancer Specific Peptoids

Jared C. Hooks<sup>1</sup>, Jaya P. Matharage<sup>1</sup>, D. Gomika Udugamasooriya<sup>1,2</sup>

Advanced Imaging Research Center<sup>1</sup> and Department of Biochemistry<sup>2</sup>,  
UT-Southwestern Medical Center, 5323 Harry Hines Blvd., Dallas Texas 75028

## 1. Basic steps of peptoid synthesis<sup>1</sup>

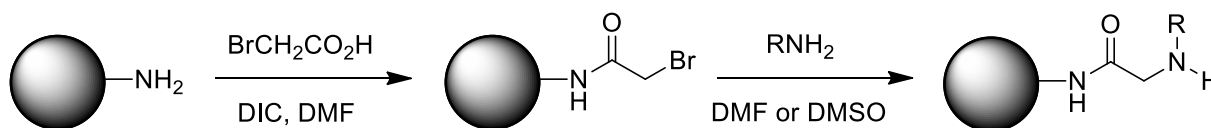

DIC : (Pr)N=C=N(Pr) R : any alkyl group

## 2. Chemical structures of the multimers synthesized.

### 2.1 Homo-dimers:

#### 2.1.1 JM79.D1

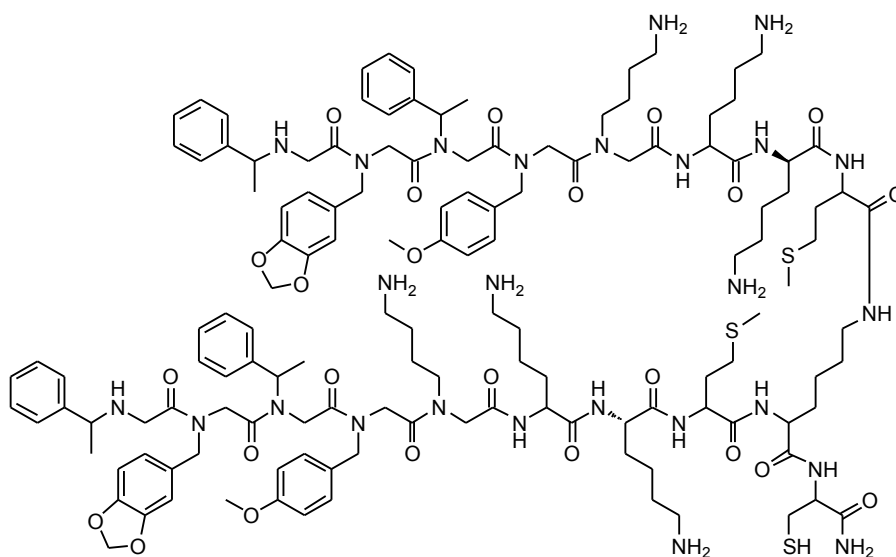

(MALDI-TOF+)  $m/z = 2661.4 [M+H]^+$  (calcd. 2660.4),  $2683.2 [M+Na]^+$  (calcd. 2682.4),

HPLC retention time: 27.9 min [40 min 20-50 acetonitrile (0.1% TFA) gradient in H<sub>2</sub>O (0.1%TFA)].



### 2.1.4 JM79.D4

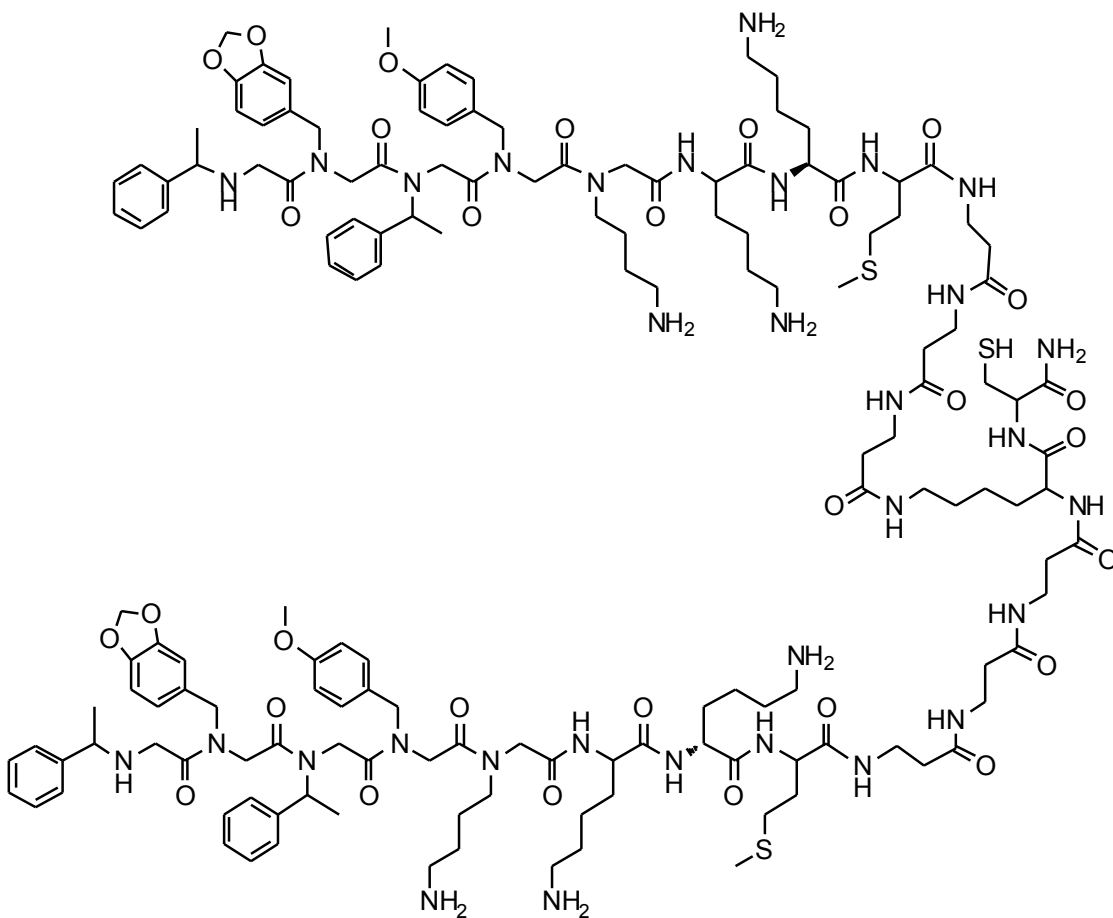

(MALDI-TOF+)  $m/z = 3088.1[M+H]^+$  (calcd. 3086.6),  $3110.9 [M+Na]^+$  (calcd. 3108.6).

HPLC retention time: 26.2 min [40 min 20-50 acetonitrile (0.1% TFA) gradient in H<sub>2</sub>O (0.1%TFA)].

## 2.2 Homo-Trimers:

### 2.2.1 JM79.T1

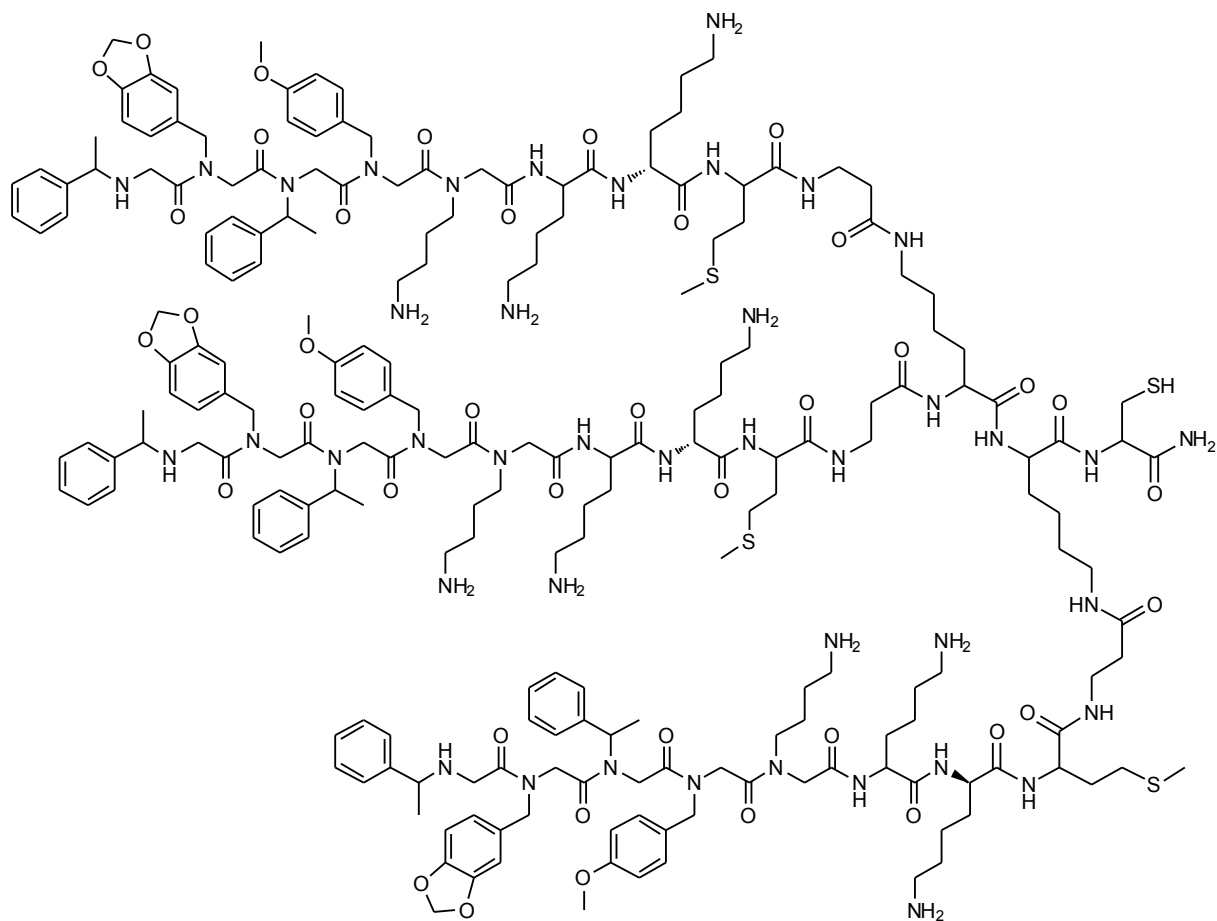

(MALDI-TOF+)  $m/z = 4230.7 [M+Na]^+$  (calcd. 4229.2),  $4245.2 [M+K]^+$  (calcd. 4245.2)



## 2.3 Hetero-drimers:

### 2.3.1 JM79-81.HD1

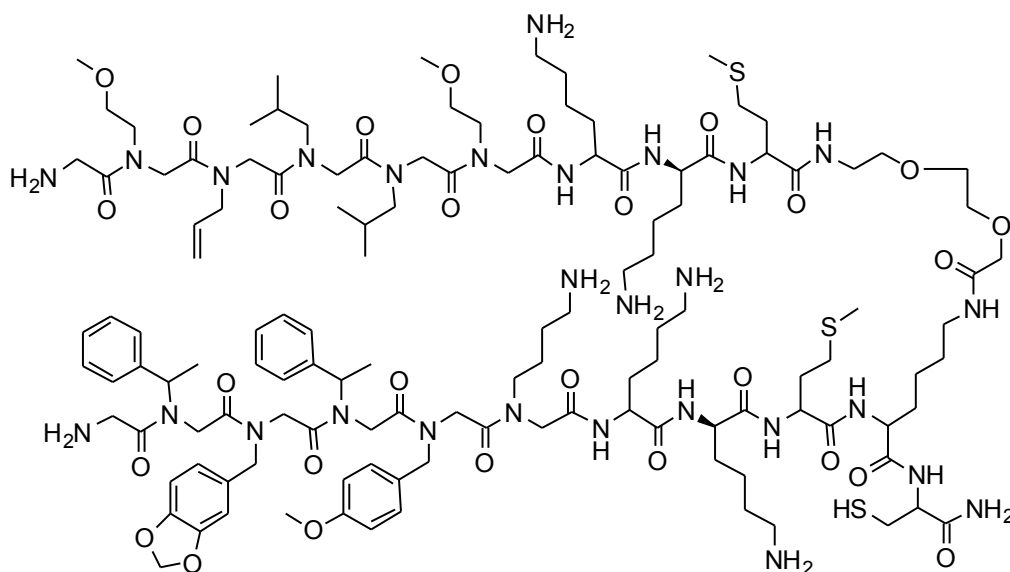

(MALDI-TOF+)  $m/z = 2656.8 [M+H]^+$  (calcd. 2654.5),  $2677.7 [M+Na]^+$  (calcd. 2676.5).

HPLC retention time: 18.2 min [30 min 0-75 acetonitrile (0.1% TFA) gradient in H<sub>2</sub>O (0.1%TFA)].

### 2.3.2 JM79-81.HD2

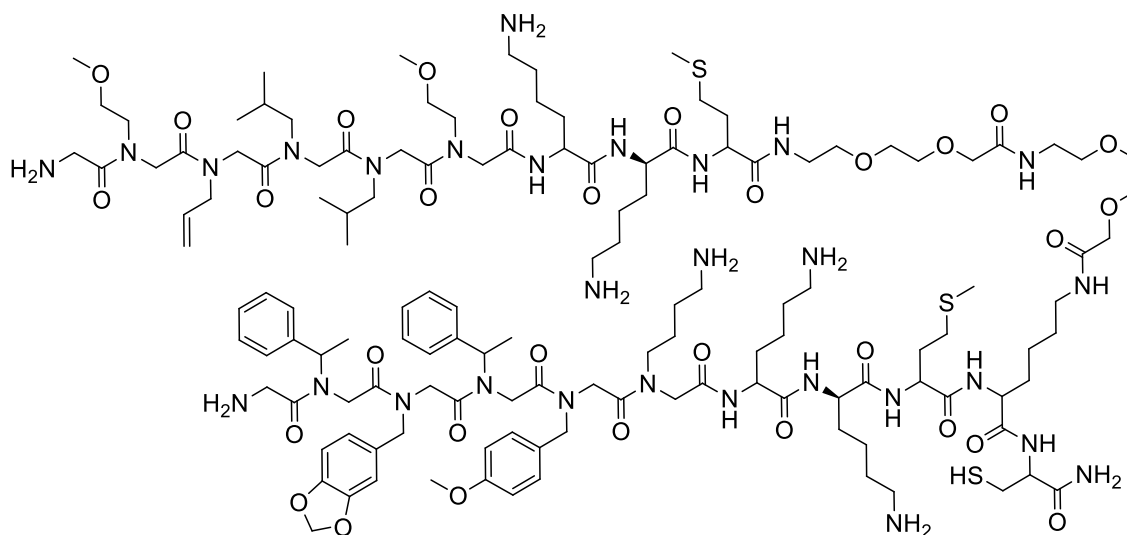

(MALDI-TOF+)  $m/z = 2822.3 [M+Na]^+$  (calcd. 2821.5),  $2837.1 [M+K]^+$  (calcd. 2837.5).

HPLC retention time: 18.1 min [30 min 0-75 acetonitrile (0.1% TFA) gradient in H<sub>2</sub>O (0.1%TFA)]



### 3.2 JM79-81.HD2

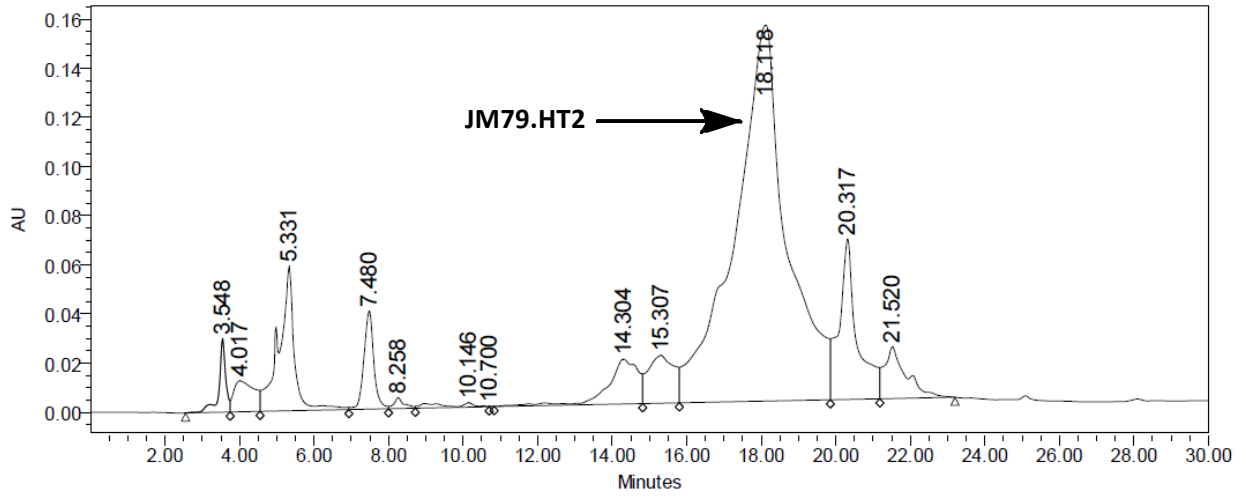

### 3.3 JM79-81.HD3

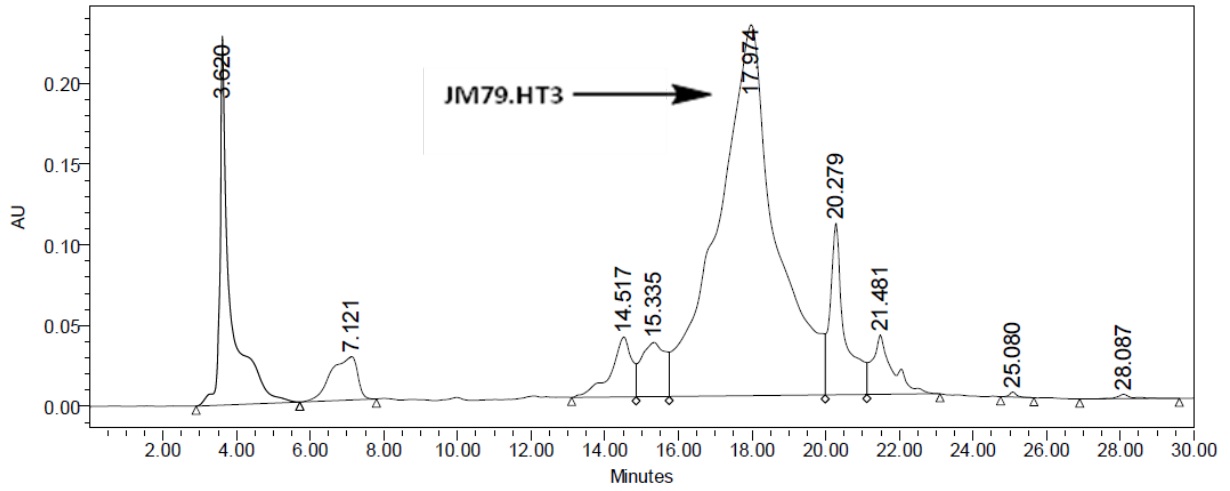



## 4. Representative mass spectrums of for each multimer type:

### 4.1. Homo-dimers:

#### 4.1.1 JM79.D2

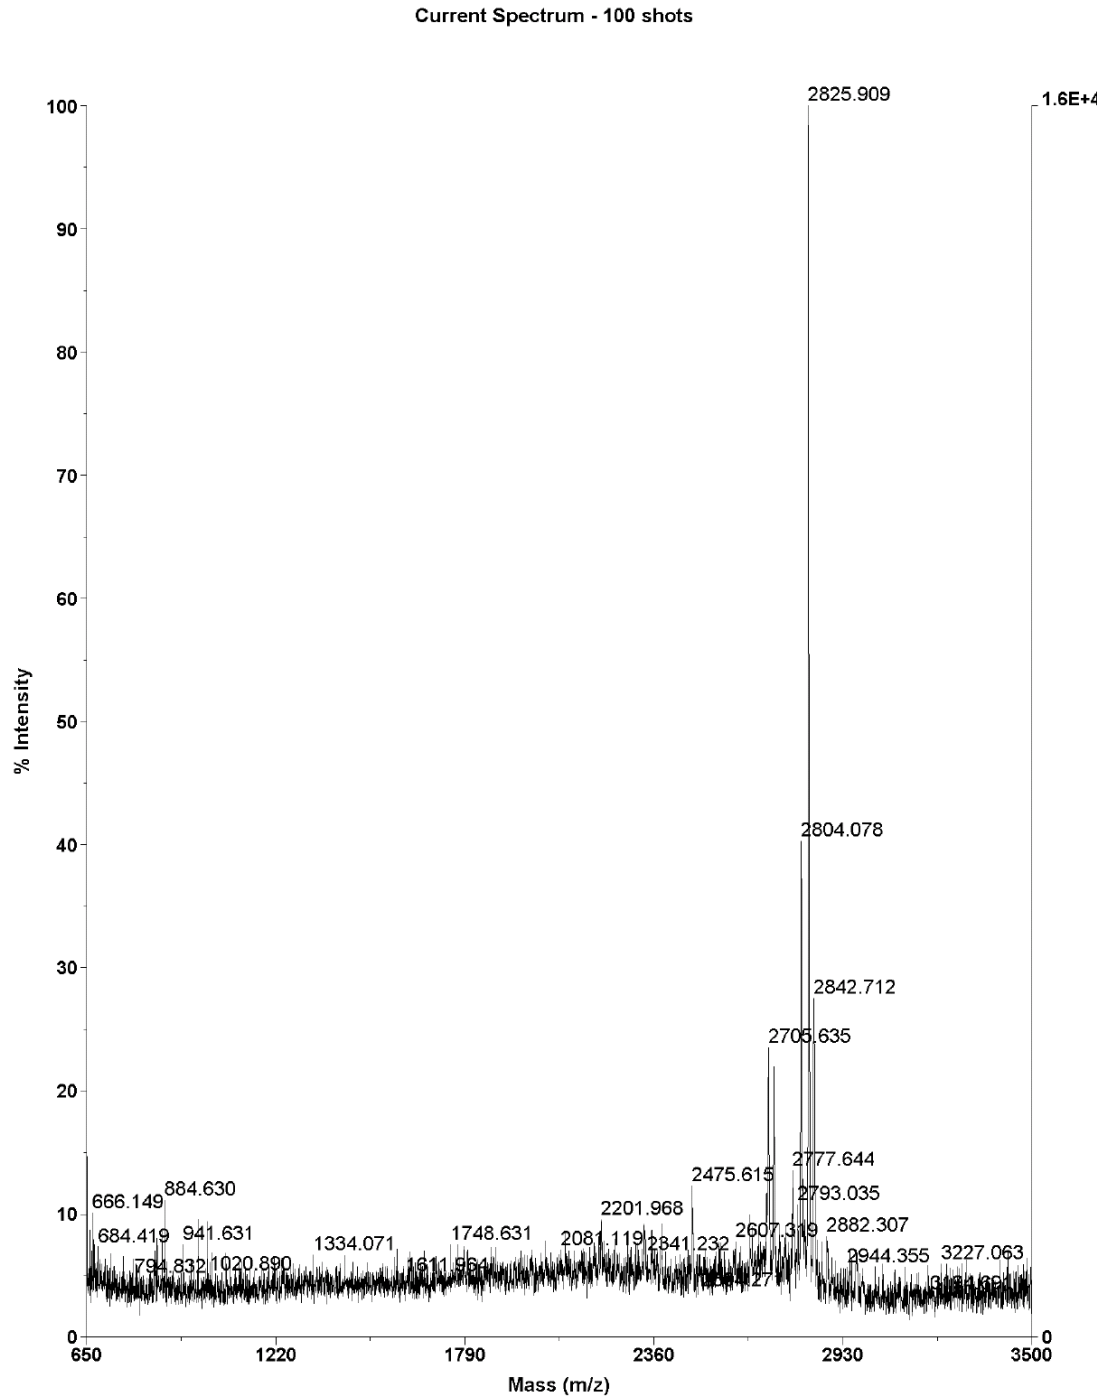

### 4.1.2 JM79.D3

Current Spectrum - 100 shots

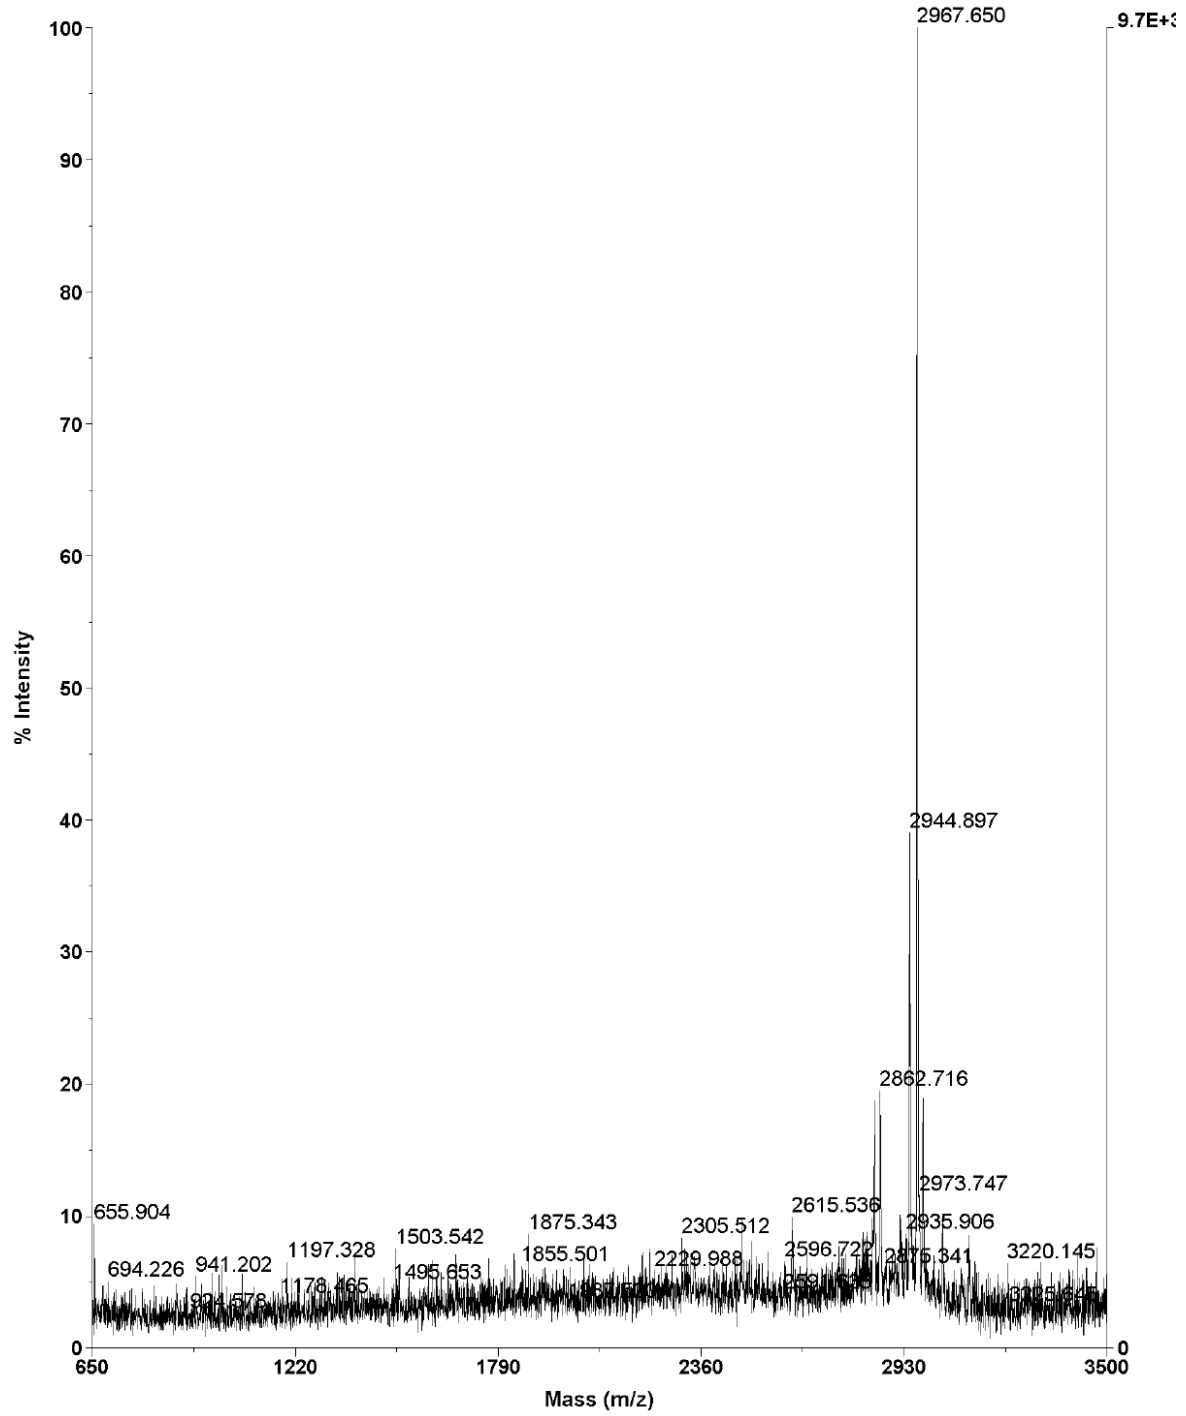

## 4.2 Homo-trimers

### 4.2.1 JM79.T1

Current Spectrum - 100 shots

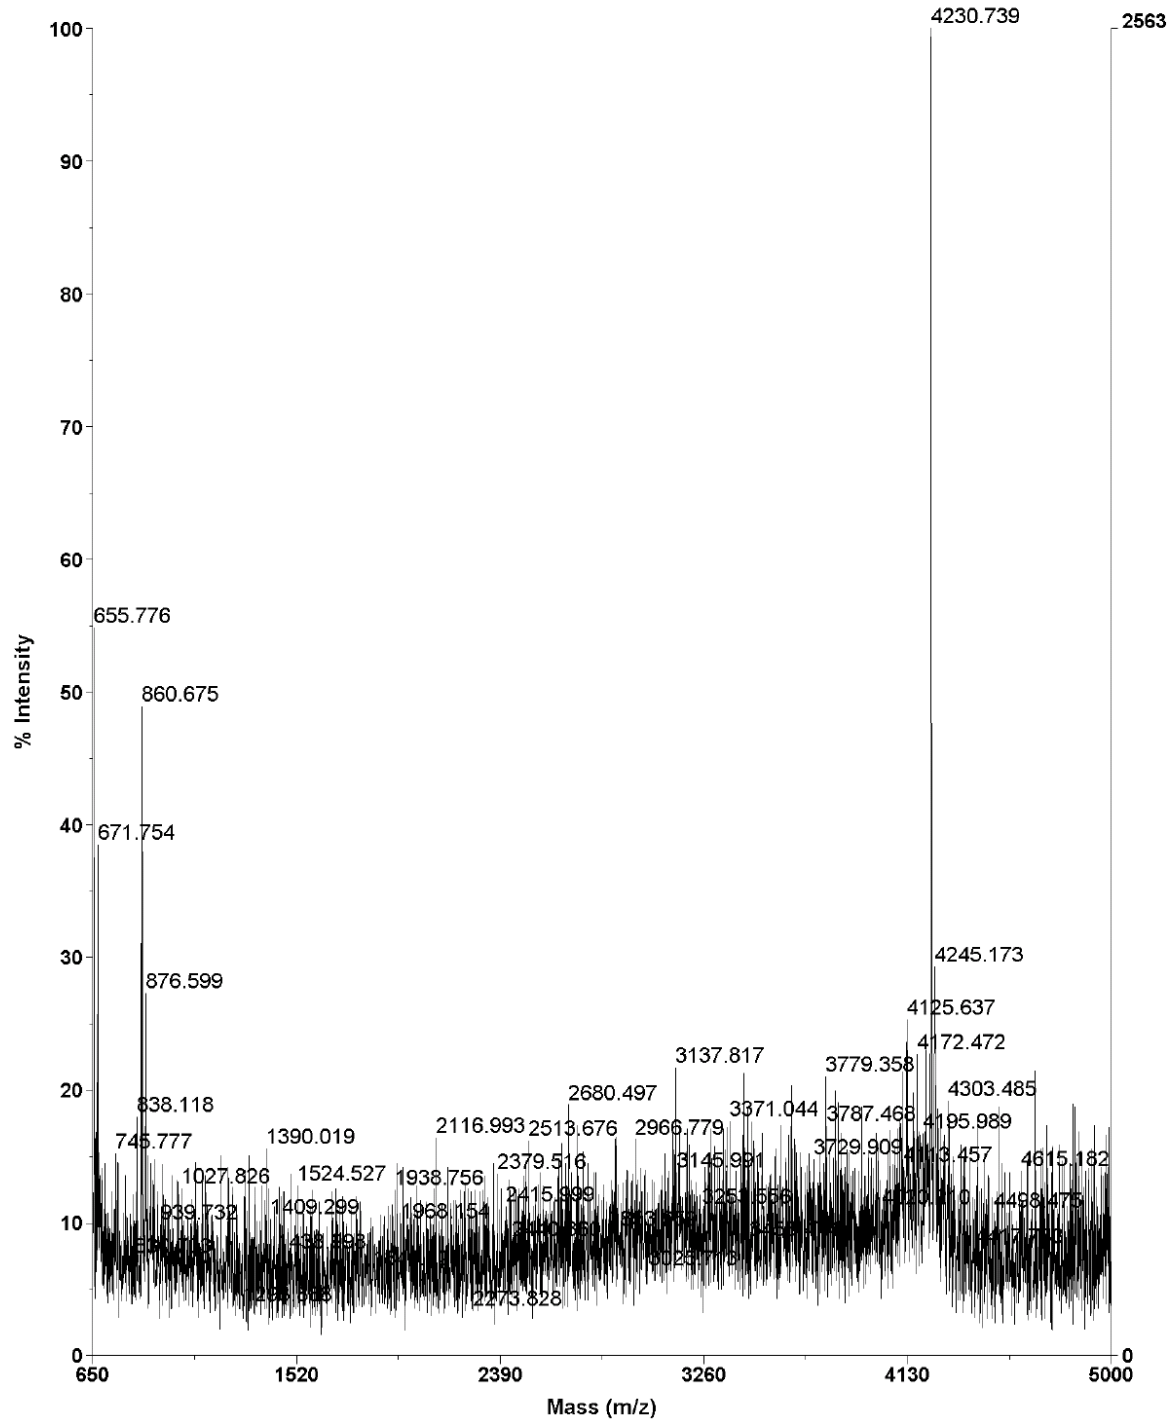

### 4.3 Hetero-dimers

#### 4.3.1 JM79-81.HD1

Current Spectrum - 185 shots

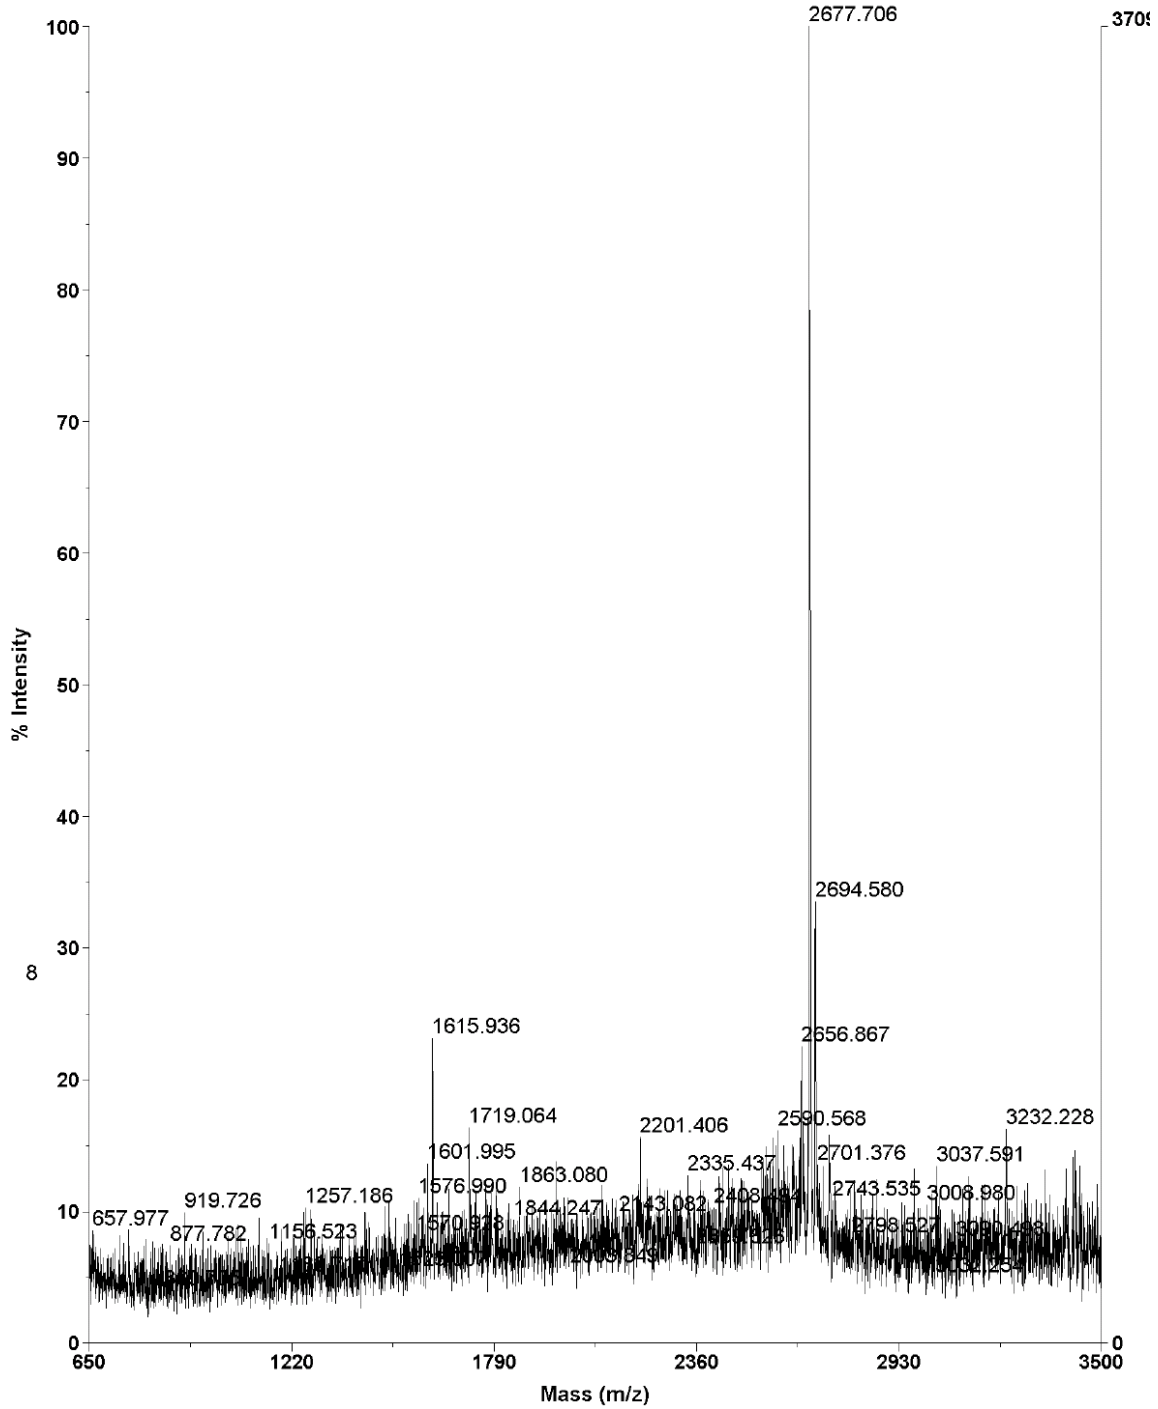

## References:

1. Zuckermann, R.N., Kerr, J. M., Kent, S. B. H., Moos, W. H. Efficient method for the preparation of peptoids [oligo(N-substituted glycines)] by submonomer solid-phase synthesis. in *J. Am. Chem. Soc.*, Vol. 114 10646–10647 (1992).
